# Supplementary material for: A National Map of NCI-Designated Cancer Center Catchment Areas on the 50th Anniversary of the Cancer Centers Program
Source: Oxford University Press journal article supplement (doi:10.1158/1055-9965.epi-21-1230), 2022-01-31
Supplement: epi-21-1230_supplemental_table_1_supp1.pdf [file epi-21-1230_supplemental_table_1_supp1.pdf]

**Supplemental Table 1.** Catchment area definitions for NCI-designated Cancer Centers, updated in May 2021.

| <b>Cancer Center</b>                                                                                           | <b>GeoID</b> | <b>Name</b>   |                      |                  |                      |                    |                      |
|----------------------------------------------------------------------------------------------------------------|--------------|---------------|----------------------|------------------|----------------------|--------------------|----------------------|
| <b>Abramson Cancer Center at University of Pennsylvania</b>                                                    | 10003        | New Castle    | 34005 Burlington     | 34015 Gloucester | 34029 Ocean          | 42029 Chester      | 42091 Montgomery     |
|                                                                                                                | 34001        | Atlantic      | 34007 Camden         | 34021 Mercer     | 42017 Bucks          | 42045 Delaware     | 42101 Philadelphia   |
| <b>Albert Einstein Cancer Center at Albert Einstein College of Medicine</b>                                    | 36005        | Bronx         |                      |                  |                      |                    |                      |
| <b>Alvin J. Siteman Cancer Center at Washington University School of Medicine &amp; Barnes-Jewish Hospital</b> | 17001        | Adams         | 17069 Hardin         | 17149 Pike       | 29007 Audrain        | 29099 Jefferson    | 29179 Reynolds       |
|                                                                                                                | 17003        | Alexander     | 17077 Jackson        | 17151 Pope       | 29017 Bollinger      | 29113 Lincoln      | 29181 Ripley         |
|                                                                                                                | 17005        | Bond          | 17081 Jefferson      | 17153 Pulaski    | 29019 Boone          | 29123 Madison      | 29183 St. Charles    |
|                                                                                                                | 17013        | Calhoun       | 17083 Jersey         | 17157 Randolph   | 29023 Butler         | 29125 Maries       | 29186 Ste. Genevieve |
|                                                                                                                | 17021        | Christian     | 17087 Johnson        | 17163 St. Clair  | 29027 Callaway       | 29127 Marion       | 29187 St. Francois   |
|                                                                                                                | 17025        | Clay          | 17115 Macon          | 17165 Saline     | 29031 Cape Girardeau | 29133 Mississippi  | 29189 St. Louis      |
|                                                                                                                | 17027        | Clinton       | 17117 Macoupin       | 17167 Sangamon   | 29035 Carter         | 29139 Montgomery   | 29201 Scott          |
|                                                                                                                | 17047        | Edwards       | 17119 Madison        | 17171 Scott      | 29051 Cole           | 29143 New Madrid   | 29207 Stoddard       |
|                                                                                                                | 17049        | Effingham     | 17121 Marion         | 17173 Shelby     | 29055 Crawford       | 29151 Osage        | 29219 Warren         |
|                                                                                                                | 17051        | Fayette       | 17127 Massac         | 17181 Union      | 29065 Dent           | 29155 Pemiscot     | 29221 Washington     |
|                                                                                                                | 17055        | Franklin      | 17133 Monroe         | 17189 Washington | 29069 Dunklin        | 29157 Perry        | 29223 Wayne          |
|                                                                                                                | 17059        | Gallatin      | 17135 Montgomery     | 17191 Wayne      | 29071 Franklin       | 29161 Phelps       | 29510 St. Louis City |
|                                                                                                                | 17061        | Greene        | 17137 Morgan         | 17193 White      | 29073 Gasconade      | 29163 Pike         |                      |
|                                                                                                                | 17065        | Hamilton      | 17145 Perry          | 17199 Williamson | 29093 Iron           | 29173 Ralls        |                      |
| <b>Arizona Cancer Center at University of Arizona</b>                                                          | 04003        | Cochise       | 04019 Pima           | 04021 Pinal      | 04023 Santa Cruz     | 04027 Yuma         |                      |
| <b>Barbara Ann Karmanos Cancer Institute at Wayne State University School of Medicine</b>                      | 26001        | Alcona        | 26035 Clare          | 26057 Gratiot    | 26089 Leelanau       | 26117 Montcalm     | 26145 Saginaw        |
|                                                                                                                | 26007        | Alpena        | 26037 Clinton        | 26063 Huron      | 26093 Livingston     | 26119 Montmorency  | 26147 St. Clair      |
|                                                                                                                | 26009        | Antrim        | 26039 Crawford       | 26065 Ingham     | 26095 Luce           | 26125 Oakland      | 26151 Sanilac        |
|                                                                                                                | 26011        | Arenac        | 26045 Eaton          | 26067 Ionia      | 26097 Mackinac       | 26129 Ogemaw       | 26155 Shiawassee     |
|                                                                                                                | 26017        | Bay           | 26047 Emmet          | 26069 Iosco      | 26099 Macomb         | 26135 Oscoda       | 26157 Tuscola        |
|                                                                                                                | 26029        | Charlevoix    | 26049 Genesee        | 26073 Isabella   | 26111 Midland        | 26137 Otsego       | 26163 Wayne          |
|                                                                                                                | 26031        | Cheboygan     | 26051 Gladwin        | 26079 Kalkaska   | 26113 Missaukee      | 26141 Presque Isle |                      |
|                                                                                                                | 26033        | Chippewa      | 26055 Grand Traverse | 26087 Lapeer     | 26115 Monroe         | 26143 Roscommon    |                      |
| <b>Case Comprehensive Cancer Center at Case Western Reserve University</b>                                     | 39005        | Ashland       | 39043 Erie           | 39085 Lake       | 39103 Medina         | 39153 Summit       |                      |
|                                                                                                                | 39007        | Ashtabula     | 39055 Geauga         | 39093 Lorain     | 39133 Portage        | 39155 Trumbull     |                      |
|                                                                                                                | 39035        | Cuyahoga      | 39077 Huron          | 39099 Mahoning   | 39151 Stark          | 39169 Wayne        |                      |
| <b>Chao Family Comprehensive Cancer Center at University of California, Irvine</b>                             | 06059        | Orange        |                      |                  |                      |                    |                      |
| <b>City of Hope Comprehensive Cancer Center</b>                                                                | 06037        | Los Angeles   | 06059 Orange         | 06065 Riverside  | 06071 San Bernardino |                    |                      |
| <b>Dan L. Duncan Comprehensive Cancer Center at Baylor College of Medicine</b>                                 | 48339        | Montgomery    | 48015 Austin         | 48157 Fort Bend  | 48167 Galveston      | 48291 Liberty      |                      |
|                                                                                                                | 48473        | Waller        | 48201 Harris         | 48039 Brazoria   | 48071 Chambers       |                    |                      |
| <b>Dana-Farber/Harvard Cancer Center</b>                                                                       | 25           | Massachusetts |                      |                  |                      |                    |                      |

**Supplemental Table 1, cont.**

| <b>Cancer Center</b>                                                                                                | <b>GeoID</b>                   | <b>Name</b>          |                       |                   |                       |                         |                         |  |
|---------------------------------------------------------------------------------------------------------------------|--------------------------------|----------------------|-----------------------|-------------------|-----------------------|-------------------------|-------------------------|--|
| <b>Duke Cancer Institute at Duke University Medical Center</b>                                                      | 37001                          | Alamance             | 37069 Franklin        | 37123 Montgomery  | 37167 Stanly          | 51031 Campbell          | 51143 Pittsylvania      |  |
|                                                                                                                     | 37007                          | Anson                | 37077 Granville       | 37125 Moore       | 37169 Stokes          | 51035 Carroll           | 51147 Prince Edward     |  |
|                                                                                                                     | 37015                          | Bertie               | 37079 Greene          | 37127 Nash        | 37171 Surry           | 51037 Charlotte         | 51161 Roanoke           |  |
|                                                                                                                     | 37017                          | Bladen               | 37081 Guilford        | 37131 Northampton | 37179 Union           | 51049 Cumberland        | 51175 Southampton       |  |
|                                                                                                                     | 37025                          | Cabarrus             | 37083 Halifax         | 37135 Orange      | 37181 Vance           | 51053 Dinwiddie         | 51590 Danville City     |  |
|                                                                                                                     | 37033                          | Caswell              | 37085 Harnett         | 37141 Pender      | 37183 Wake            | 51063 Floyd             | 51595 Emporia City      |  |
|                                                                                                                     | 37037                          | Chatham              | 37091 Hertford        | 37145 Person      | 37185 Warren          | 51067 Franklin          | 51680 Lynchburg City    |  |
|                                                                                                                     | 37049                          | Craven               | 37093 Hoke            | 37147 Pitt        | 37191 Wayne           | 51081 Greensville       | 51690 Martinsville City |  |
|                                                                                                                     | 37051                          | Cumberland           | 37097 Iredell         | 37151 Randolph    | 37195 Wilson          | 51083 Halifax           | 51770 Roanoke City      |  |
|                                                                                                                     | 37057                          | Davidson             | 37101 Johnston        | 37153 Richmond    | 37197 Yadkin          | 51089 Henry             | 51775 Salem City        |  |
|                                                                                                                     | 37059                          | Davie                | 37103 Jones           | 37155 Robeson     | 45033 Dillon          | 51111 Lunenburg         |                         |  |
|                                                                                                                     | 37061                          | Duplin               | 37105 Lee             | 37157 Rockingham  | 45069 Marlboro        | 51117 Mecklenburg       |                         |  |
|                                                                                                                     | 37063                          | Durham               | 37107 Lenoir          | 37159 Rowan       | 51007 Amelia          | 51121 Montgomery        |                         |  |
|                                                                                                                     | 37065                          | Edgecombe            | 37117 Martin          | 37163 Sampson     | 51019 Bedford         | 51135 Nottoway          |                         |  |
|                                                                                                                     | 37067                          | Forsyth              | 37119 Mecklenburg     | 37165 Scotland    | 51025 Brunswick       | 51141 Patrick           |                         |  |
|                                                                                                                     | <b>Fox Chase Cancer Center</b> | 34001                | Atlantic              | 34009 Cape May    | 34021 Mercer          | 42011 Berks             | 42045 Delaware          |  |
|                                                                                                                     |                                | 34005                | Burlington            | 34011 Cumberland  | 34029 Ocean           | 42017 Bucks             | 42091 Montgomery        |  |
| 34007                                                                                                               |                                | Camden               | 34015 Gloucester      | 34033 Salem       | 42029 Chester         | 42101 Philadelphia      |                         |  |
| <b>Fred &amp; Pamela Buffett Cancer Center at Nebraska Medicine &amp; the University of Nebraska Medical Center</b> | 31                             | Nebraska             |                       |                   |                       |                         |                         |  |
| <b>Fred Hutchinson/University of Washington Cancer Consortium</b>                                                   | 53                             | Washington           |                       |                   |                       |                         |                         |  |
| <b>Georgetown Lombardi Comprehensive Cancer Center at Georgetown University</b>                                     | 11001                          | District of Columbia | 24031 Montgomery      | 34003 Bergen      | 51059 Fairfax         | 51600 Fairfax City      |                         |  |
|                                                                                                                     |                                |                      | 24033 Prince George's | 51013 Arlington   | 51510 Alexandria City | 51610 Falls Church City |                         |  |
| <b>Harold C. Simmons Comprehensive Cancer Center at University of Texas Southwestern Medical Center</b>             | 48085                          | Collin               | 48139 Ellis           | 48251 Johnson     | 48397 Rockwall        | 48497 Wise              |                         |  |
|                                                                                                                     | 48113                          | Dallas               | 48221 Hood            | 48257 Kaufman     | 48425 Somervell       |                         |                         |  |
|                                                                                                                     | 48121                          | Denton               | 48231 Hunt            | 48367 Parker      | 48439 Tarrant         |                         |                         |  |
| <b>Herbert Irving Comprehensive Cancer Center at Columbia University</b>                                            | 34003                          | Bergen               | 36047 Kings           | 36081 Queens      | 36087 Rockland        |                         |                         |  |
|                                                                                                                     | 36005                          | Bronx                | 36061 New York        | 36085 Richmond    | 36119 Westchester     |                         |                         |  |
| <b>Holden Comprehensive Cancer Center at University of Iowa</b>                                                     | 19                             | Iowa                 |                       |                   |                       |                         |                         |  |
| <b>Hollings Cancer Center at Medical University of South Carolina</b>                                               | 45                             | South Carolina       |                       |                   |                       |                         |                         |  |
| <b>Huntsman Cancer Institute at University of Utah</b>                                                              | 16                             | Idaho                | 30 Montana            | 32 Nevada         | 49 Utah               | 56 Wyoming              |                         |  |
| <b>Indiana University Melvin &amp; Bren Simon Comprehensive Cancer Center</b>                                       | 18                             | Indiana              |                       |                   |                       |                         |                         |  |

Supplemental Table 1, cont.

| <u>Cancer Center</u>                                                                  | <u>GeoID Name</u>                  |                      |                      |                       |                             |                           |
|---------------------------------------------------------------------------------------|------------------------------------|----------------------|----------------------|-----------------------|-----------------------------|---------------------------|
| <b>Jonsson Comprehensive Cancer Center at University of California at Los Angeles</b> | 6037 Los Angeles                   |                      |                      |                       |                             |                           |
| <b>Knight Cancer Institute at Oregon Health &amp; Science University</b>              | 41 Oregon                          |                      |                      |                       |                             |                           |
| <b>Laura &amp; Isaac Perlmutter Cancer Center at NYU Langone Health</b>               | <i>Geographic Catchment Area:</i>  |                      |                      |                       |                             |                           |
|                                                                                       | 36047 Kings                        | 36061 New York       | 36081 Queens         |                       |                             |                           |
|                                                                                       | 36059 Nassau                       | (south of 57th St.)  | 36085 Richmond       |                       |                             |                           |
|                                                                                       | <i>Statistical Catchment Area:</i> |                      |                      |                       |                             |                           |
|                                                                                       | 36047 Kings                        | 36059 Nassau         | 36061 New York       | 36081 Queens          | 36085 Richmond              |                           |
| <b>Markey Cancer Center at University of Kentucky</b>                                 | 21 Kentucky                        |                      |                      |                       |                             |                           |
| <b>Masonic Cancer Center at University of Minnesota</b>                               | 27 Minnesota                       |                      |                      |                       |                             |                           |
| <b>Massey Cancer Center at Virginia Commonwealth University</b>                       | 51001 Accomack                     | 51057 Essex          | 51101 King William   | 51145 Powhatan        | 51570 Colonial Heights City | 51730 Petersburg City     |
|                                                                                       | 51007 Amelia                       | 51073 Gloucester     | 51103 Lancaster      | 51147 Prince Edward   |                             | 51735 Poquoson City       |
|                                                                                       | 51011 Appomattox                   | 51075 Goochland      | 51109 Louisa         | 51149 Prince George   | 51590 Danville City         | 51740 Portsmouth City     |
|                                                                                       | 51025 Brunswick                    | 51081 Greensville    | 51111 Lunenburg      | 51159 Richmond        | 51595 Emporia City          | 51760 Richmond City       |
|                                                                                       | 51029 Buckingham                   | 51083 Halifax        | 51115 Mathews        | 51175 Southampton     | 51620 Franklin City         | 51800 Suffolk City        |
|                                                                                       | 51031 Campbell                     | 51085 Hanover        | 51117 Mecklenburg    | 51177 Spotsylvania    | 51630 Fredericksburg City   | 51810 Virginia Beach City |
|                                                                                       | 51033 Caroline                     | 51087 Henrico        | 51119 Middlesex      | 51179 Stafford        | 51650 Hampton City          | 51830 Williamsburg City   |
|                                                                                       | 51036 Charles City                 | 51089 Henry          | 51127 New Kent       | 51181 Surry           | 51670 Hopewell City         |                           |
|                                                                                       | 51037 Charlotte                    | 51093 Isle of Wight  | 51131 Northampton    | 51183 Sussex          | 51680 Lynchburg City        |                           |
|                                                                                       | 51041 Chesterfield                 | 51095 James City     | 51133 Northumberland | 51193 Westmoreland    | 51690 Martinsville City     |                           |
|                                                                                       | 51049 Cumberland                   | 51097 King and Queen | 51135 Nottoway       | 51199 York            | 51700 Newport News City     |                           |
|                                                                                       | 51053 Dinwiddie                    | 51099 King George    | 51143 Pittsylvania   | 51550 Chesapeake City | 51710 Norfolk City          |                           |
|                                                                                       | <b>Mayo Clinic Cancer Center</b>   | 04013 Maricopa       | 19033 Cerro Gordo    | 19191 Winneshiek      | 27055 Houston               | 27147 Steele              |
| 12003 Baker                                                                           |                                    | 19037 Chickasaw      | 19195 Worth          | 27079 Le Sueur        | 27157 Wabasha               | 55063 La Crosse           |
| 12019 Clay                                                                            |                                    | 19063 Emmet          | 27013 Blue Earth     | 27091 Martin          | 27161 Waseca                | 55091 Pepin               |
| 12031 Duval                                                                           |                                    | 19067 Floyd          | 27015 Brown          | 27099 Mower           | 27165 Watonwan              | 55093 Pierce              |
| 12035 Flagler                                                                         |                                    | 19081 Hancock        | 27039 Dodge          | 27103 Nicollet        | 27169 Winona                | 55121 Trempealeau         |
| 12089 Nassau                                                                          |                                    | 19089 Howard         | 27043 Faribault      | 27109 Olmsted         | 55011 Buffalo               | 55123 Vernon              |
| 12107 Putnam                                                                          |                                    | 19109 Kossuth        | 27045 Fillmore       | 27127 Redwood         | 55017 Chippewa              |                           |
| 12109 St. Johns                                                                       |                                    | 19131 Mitchell       | 27047 Freeborn       | 27131 Rice            | 55023 Crawford              |                           |
| 19005 Allamakee                                                                       |                                    | 19189 Winnebago      | 27049 Goodhue        | 27139 Scott           | 55033 Dunn                  |                           |

Supplemental Table 1, cont.

| <b>Cancer Center</b>                                                                          | <b>GeoID</b>                       | <b>Name</b>   |                                              |                    |                    |                    |                    |
|-----------------------------------------------------------------------------------------------|------------------------------------|---------------|----------------------------------------------|--------------------|--------------------|--------------------|--------------------|
| <b>Mays Cancer Center at UT Health San Antonio, University of Texas Health Science Center</b> | 48013                              | Atascosa      | 48127 Dimmit                                 | 48247 Jim Hogg     | 48273 Kleberg      | 48385 Real         | 48493 Wilson       |
|                                                                                               | 48019                              | Bandera       | 48131 Duval                                  | 48249 Jim Wells    | 48283 La Salle     | 48409 San Patricio | 48505 Zapata       |
|                                                                                               | 48025                              | Bee           | 48137 Edwards                                | 48255 Karnes       | 48297 Live Oak     | 48427 Starr        | 48507 Zavala       |
|                                                                                               | 48029                              | Bexar         | 48163 Frio                                   | 48259 Kendall      | 48311 McMullen     | 48463 Uvalde       |                    |
|                                                                                               | 48047                              | Brooks        | 48171 Gillespie                              | 48261 Kenedy       | 48323 Maverick     | 48465 Val Verde    |                    |
|                                                                                               | 48061                              | Cameron       | 48187 Guadalupe                              | 48265 Kerr         | 48325 Medina       | 48479 Webb         |                    |
|                                                                                               | 48091                              | Comal         | 48215 Hidalgo                                | 48271 Kinney       | 48355 Nueces       | 48489 Willacy      |                    |
|                                                                                               |                                    |               |                                              |                    |                    |                    |                    |
| <b>Memorial Sloan-Kettering Cancer Center</b>                                                 | <i>Geographic Catchment Area:</i>  |               | 100 mile radius of New York, NY (ZCTA)       |                    |                    |                    |                    |
|                                                                                               | <i>Statistical Catchment Area:</i> |               |                                              |                    |                    |                    |                    |
|                                                                                               | 09001                              | Fairfield     | 34003 Bergen                                 | 34027 Morris       | 36027 Dutchess     | 36103 Suffolk      | 42077 Lehigh       |
|                                                                                               | 09003                              | Hartford      | 34005 Burlington                             | 34029 Ocean        | 36039 Greene       | 36105 Sullivan     | 42079 Luzerne      |
|                                                                                               | 09005                              | Litchfield    | 34007 Camden                                 | 34031 Passaic      | 36047 Kings        | 36111 Ulster       | 42089 Monroe       |
|                                                                                               | 09007                              | Middlesex     | 34013 Essex                                  | 34035 Somerset     | 36059 Nassau       | 36119 Westchester  | 42091 Montgomery   |
|                                                                                               | 09009                              | New Haven     | 34015 Gloucester                             | 34037 Sussex       | 36061 New York     | 42011 Berks        | 42095 Northampton  |
|                                                                                               | 09011                              | New London    | 34017 Hudson                                 | 34039 Union        | 36071 Orange       | 42017 Bucks        | 42101 Philadelphia |
|                                                                                               | 09013                              | Tolland       | 34019 Hunterdon                              | 34041 Warren       | 36079 Putnam       | 42025 Carbon       | 42103 Pike         |
|                                                                                               | 25003                              | Berkshire     | 34021 Mercer                                 | 36005 Bronx        | 36081 Queens       | 42029 Chester      | 42107 Schuylkill   |
|                                                                                               | 25013                              | Hampden       | 34023 Middlesex                              | 36021 Columbia     | 36085 Richmond     | 42045 Delaware     | 42115 Susquehanna  |
|                                                                                               | 34001                              | Atlantic      | 34025 Monmouth                               | 36025 Delaware     | 36087 Rockland     | 42069 Lackawanna   | 42127 Wayne        |
| <b>Moffitt Cancer Center</b>                                                                  | 12015                              | Charlotte     | 12049 Hardee                                 | 12057 Hillsborough | 12081 Manatee      | 12105 Polk         |                    |
|                                                                                               | 12017                              | Citrus        | 12053 Hernando                               | 12069 Lake         | 12101 Pasco        | 12115 Sarasota     |                    |
|                                                                                               | 12027                              | DeSoto        | 12055 Highlands                              | 12071 Lee          | 12103 Pinellas     | 12119 Sumter       |                    |
| <b>Moore's Comprehensive Cancer Center at University of California San Diego</b>              | 6073                               | San Diego     |                                              |                    |                    |                    |                    |
| <b>Norris Cotton Cancer Center at Dartmouth-Hitchcock Medical Center</b>                      | 33                                 | New Hampshire | 50 Vermont                                   |                    |                    |                    |                    |
| <b>O'Neal Comprehensive Cancer Center at University of Alabama at Birmingham</b>              | 01                                 | Alabama       |                                              |                    |                    |                    |                    |
| <b>Robert H. Lurie Comprehensive Cancer Center at Northwestern University</b>                 | 17031                              | Cook          | 17063 Grundy                                 | 17091 Kankakee     | 17097 Lake         | 17197 Will         |                    |
|                                                                                               | 17043                              | DuPage        | 17089 Kane                                   | 17093 Kendall      | 17111 McHenry      |                    |                    |
| <b>Roswell Park Comprehensive Cancer Center</b>                                               | 36003                              | Allegany      | 36013 Chautauqua                             | 36037 Genesee      | 36073 Orleans      |                    |                    |
|                                                                                               | 36009                              | Cattaraugus   | 36029 Erie                                   | 36063 Niagara      | 36121 Wyoming      |                    |                    |
| <b>Rutgers Cancer Institute of New Jersey at Rutgers Biomedical &amp; Health Sciences</b>     | 34                                 | New Jersey    |                                              |                    |                    |                    |                    |
| <b>Sidney Kimmel Cancer Center at Thomas Jefferson University</b>                             | <i>Geographic Catchment Area:</i>  |               | 1-hour drive-time radius of Philadelphia, PA |                    |                    |                    |                    |
|                                                                                               | <i>Statistical Catchment Area:</i> |               |                                              |                    |                    |                    |                    |
|                                                                                               | 34007                              | Camden        | 42045 Delaware                               | 42091 Montgomery   | 42101 Philadelphia |                    |                    |

Supplemental Table 1, cont.

| <u>Cancer Center</u>                                                                                                  | <u>GeoID Name</u>                  |                                   |                     |                                                 |                  |  |
|-----------------------------------------------------------------------------------------------------------------------|------------------------------------|-----------------------------------|---------------------|-------------------------------------------------|------------------|--|
| <b>Sidney Kimmel Comprehensive Cancer Center at Johns Hopkins University</b>                                          | 24 Maryland                        |                                   |                     |                                                 |                  |  |
| <b>Stanford Cancer Institute at Stanford University</b>                                                               | 06001 Alameda                      | 06047 Merced                      | 06069 San Benito    | 06081 San Mateo                                 | 06087 Santa Cruz |  |
|                                                                                                                       | 06013 Contra Costa                 | 06053 Monterey                    | 06077 San Joaquin   | 06085 Santa Clara                               | 06099 Stanislaus |  |
| <b>Stephenson Cancer Center at University of Oklahoma</b>                                                             | 40 Oklahoma                        |                                   |                     |                                                 |                  |  |
| <b>Sylvester Comprehensive Cancer Center at University of Miami Miller School of Medicine</b>                         | 12011 Broward                      | 12086 Miami-Dade                  | 12087 Monroe        | 12099 Palm Beach                                |                  |  |
| <b>The Ohio State University Comprehensive Cancer Center at James Cancer Hospital &amp; Solove Research Institute</b> | 39 Ohio                            |                                   |                     |                                                 |                  |  |
| <b>Tisch Cancer Institute at Icahn School of Medicine at Mount Sinai</b>                                              | 36005 Bronx                        | 36047 Kings                       | 36061 New York      | 36081 Queens                                    | 36085 Richmond   |  |
| <b>UC Davis Comprehensive Cancer Center at University of California at Davis</b>                                      | 06003 Alpine                       | 06011 Colusa                      | 06057 Nevada        | 06091 Sierra                                    | 06103 Tehama     |  |
|                                                                                                                       | 06005 Amador                       | 06017 El Dorado                   | 06061 Placer        | 06095 Solano                                    | 06113 Yolo       |  |
|                                                                                                                       | 06007 Butte                        | 06021 Glenn                       | 06067 Sacramento    | 06099 Stanislaus                                | 06115 Yuba       |  |
|                                                                                                                       | 06009 Calaveras                    | 06047 Merced                      | 06077 San Joaquin   | 06101 Sutter                                    |                  |  |
| <b>UCSF Helen Diller Family Comprehensive Cancer Center at University of California at San Francisco</b>              | 06001 Alameda                      | 06021 Glenn                       | 06047 Merced        | 06075 San Francisco                             | 06095 Solano     |  |
|                                                                                                                       | 06007 Butte                        | 06033 Lake                        | 06053 Monterey      | 06077 San Joaquin                               | 06097 Sonoma     |  |
|                                                                                                                       | 06011 Colusa                       | 06039 Madera                      | 06055 Napa          | 06081 San Mateo                                 | 06099 Stanislaus |  |
|                                                                                                                       | 06013 Contra Costa                 | 06041 Marin                       | 06067 Sacramento    | 06085 Santa Clara                               | 06101 Sutter     |  |
|                                                                                                                       | 06019 Fresno                       | 06045 Mendocino                   | 06069 San Benito    | 06087 Santa Cruz                                | 06113 Yolo       |  |
| <b>UNC Lineberger Comprehensive Cancer Center</b>                                                                     | 37 North Carolina                  |                                   |                     |                                                 |                  |  |
| <b>University of Chicago Comprehensive Cancer Center</b>                                                              | 17031 Cook                         | 17089 Kane                        | 17097 Lake          | 17197 Will                                      | 18091 LaPorte    |  |
|                                                                                                                       | 17043 DuPage                       | 17091 Kankakee                    | 17111 McHenry       | 18089 Lake                                      | 18127 Porter     |  |
| <b>University of Colorado Cancer Center</b>                                                                           | 08 Colorado                        |                                   |                     |                                                 |                  |  |
| <b>University of Hawai'i Cancer Center</b>                                                                            | <i>Geographic Catchment Area:</i>  |                                   |                     |                                                 |                  |  |
|                                                                                                                       | 15 Hawai'i                         | 64 Federated States of Micronesia | 66 Guam             | 69 Commonwealth of the Northern Mariana Islands | 70 Palau         |  |
|                                                                                                                       | 60 American Samoa                  |                                   | 68 Marshall Islands |                                                 |                  |  |
|                                                                                                                       | <i>Statistical Catchment Area:</i> |                                   |                     |                                                 |                  |  |
|                                                                                                                       | 15 Hawai'i                         |                                   |                     |                                                 |                  |  |
| <b>University of Kansas Cancer Center at the University of Kansas</b>                                                 | 20 Kansas                          | 29021 Buchanan                    | 29049 Clinton       | 29097 Jasper                                    | 29165 Platte     |  |
|                                                                                                                       | 29003 Andrew                       | 29033 Carroll                     | 29083 Henry         | 29101 Johnson                                   | 29177 Ray        |  |
|                                                                                                                       | 29011 Barton                       | 29037 Cass                        | 29087 Holt          | 29107 Lafayette                                 | 29217 Vernon     |  |
|                                                                                                                       | 29013 Bates                        | 29047 Clay                        | 29095 Jackson       | 29147 Nodaway                                   |                  |  |

Supplemental Table 1, cont.

| <b>Cancer Center</b>                                                                       | <b>GeoID</b> | <b>Name</b>  |          |            |            |               |                |                      |         |                     |       |                |
|--------------------------------------------------------------------------------------------|--------------|--------------|----------|------------|------------|---------------|----------------|----------------------|---------|---------------------|-------|----------------|
| <b>University of Maryland Marlene &amp; Stewart Greenebaum Comprehensive Cancer Center</b> | 24003        | Anne Arundel | 24013    | Carroll    | 24021      | Frederick     | 24027          | Howard               | 24033   | Prince George's     | 24510 | Baltimore City |
|                                                                                            | 24005        | Baltimore    | 24017    | Charles    | 24025      | Harford       | 24031          | Montgomery           | 24043   | Washington          |       |                |
| <b>University of Michigan Rogel Cancer Center</b>                                          | 26           | Michigan     |          |            |            |               |                |                      |         |                     |       |                |
| <b>University of New Mexico Comprehensive Cancer Center</b>                                | 35           | New Mexico   |          |            |            |               |                |                      |         |                     |       |                |
| <b>University of Texas MD Anderson Cancer Center</b>                                       | 48           | Texas        |          |            |            |               |                |                      |         |                     |       |                |
| <b>University of Virginia Cancer Center</b>                                                | 51003        | Albemarle    | 51045    | Craig      | 51105      | Lee           | 51167          | Russell              | 51590   | Danville City       | 54025 | Greenbrier     |
|                                                                                            | 51005        | Alleghany    | 51047    | Culpeper   | 51109      | Louisa        | 51169          | Scott                | 51630   | Fredericksburg City | 54031 | Hardy          |
|                                                                                            | 51009        | Amherst      | 51049    | Cumberland | 51113      | Madison       | 51171          | Shenandoah           | 51640   | Galax City          | 54039 | Kanawha        |
|                                                                                            | 51011        | Appomattox   | 51051    | Dickenson  | 51121      | Montgomery    | 51173          | Smyth                | 51660   | Harrisonburg City   | 54047 | McDowell       |
|                                                                                            | 51015        | Augusta      | 51061    | Fauquier   | 51125      | Nelson        | 51177          | Spotsylvania         | 51678   | Lexington City      | 54055 | Mercer         |
|                                                                                            | 51017        | Bath         | 51063    | Floyd      | 51137      | Orange        | 51179          | Stafford             | 51680   | Lynchburg City      | 54063 | Monroe         |
|                                                                                            | 51019        | Bedford      | 51065    | Fluvanna   | 51139      | Page          | 51185          | Tazewell             | 51690   | Martinsville City   | 54067 | Nicholas       |
|                                                                                            | 51021        | Bland        | 51067    | Franklin   | 51141      | Patrick       | 51187          | Warren               | 51720   | Norton City         | 54071 | Pendleton      |
|                                                                                            | 51023        | Botetourt    | 51069    | Frederick  | 51143      | Pittsylvania  | 51191          | Washington           | 51750   | Radford City        | 54075 | Pocahontas     |
|                                                                                            | 51027        | Buchanan     | 51071    | Giles      | 51147      | Prince Edward | 51195          | Wise                 | 51770   | Roanoke City        | 54081 | Raleigh        |
|                                                                                            | 51029        | Buckingham   | 51077    | Grayson    | 51155      | Pulaski       | 51197          | Wythe                | 51775   | Salem City          | 54089 | Summers        |
|                                                                                            | 51031        | Campbell     | 51079    | Greene     | 51157      | Rappahannock  | 51520          | Bristol City         | 51790   | Staunton City       | 54109 | Wyoming        |
|                                                                                            | 51035        | Carroll      | 51083    | Halifax    | 51161      | Roanoke       | 51530          | Buena Vista City     | 51820   | Waynesboro City     |       |                |
|                                                                                            | 51037        | Charlotte    | 51089    | Henry      | 51163      | Rockbridge    | 51540          | Charlottesville City | 51840   | Winchester City     |       |                |
| 51043                                                                                      | Clarke       | 51091        | Highland | 51165      | Rockingham | 51580         | Covington City | 54019                | Fayette |                     |       |                |
| <b>University of Wisconsin Carbone Cancer Center</b>                                       | 55           | Wisconsin    |          |            |            |               |                |                      |         |                     |       |                |
| <b>UPMC Hillman Cancer Center</b>                                                          | 42003        | Allegheny    | 42019    | Butler     | 42033      | Clearfield    | 42053          | Forest               | 42073   | Lawrence            | 42121 | Venango        |
|                                                                                            | 42005        | Armstrong    | 42021    | Cambria    | 42039      | Crawford      | 42059          | Greene               | 42083   | McKean              | 42123 | Warren         |
|                                                                                            | 42007        | Beaver       | 42023    | Cameron    | 42047      | Elk           | 42061          | Huntingdon           | 42085   | Mercer              | 42125 | Washington     |
|                                                                                            | 42009        | Bedford      | 42027    | Centre     | 42049      | Erie          | 42063          | Indiana              | 42105   | Potter              | 42129 | Westmoreland   |
|                                                                                            | 42013        | Blair        | 42031    | Clarion    | 42051      | Fayette       | 42065          | Jefferson            | 42111   | Somerset            |       |                |
| <b>USC Norris Comprehensive Cancer Center at University of Southern California</b>         | 06037        | Los Angeles  |          |            |            |               |                |                      |         |                     |       |                |
| <b>Vanderbilt-Ingram Cancer Center</b>                                                     | 01089        | Madison      | 21033    | Caldwell   | 21075      | Fulton        | 21143          | Lyon                 | 21213   | Simpson             |       |                |
|                                                                                            | 01033        | Colbert      | 21003    | Allen      | 21035      | Calloway      | 21083          | Graves               | 21145   | McCracken           | 21219 | Todd           |
|                                                                                            | 01071        | Jackson      | 21007    | Ballard    | 21039      | Carlisle      | 21105          | Hickman              | 21157   | Marshall            | 21221 | Trigg          |
|                                                                                            | 01077        | Lauderdale   | 21009    | Barren     | 21047      | Christian     | 21107          | Hopkins              | 21171   | Monroe              | 21227 | Warren         |
|                                                                                            | 01083        | Limestone    | 21031    | Butler     | 21061      | Edmonson      | 21141          | Logan                | 21177   | Muhlenberg          |       |                |

**Supplemental Table 1, cont.**

| <b>Cancer Center</b>                                   | <b>GeoID</b>                                                    | <b>Name</b> |             |           |       |            |       |              |       |               |       |                   |  |
|--------------------------------------------------------|-----------------------------------------------------------------|-------------|-------------|-----------|-------|------------|-------|--------------|-------|---------------|-------|-------------------|--|
| <b>Wake Forest Baptist Comprehensive Cancer Center</b> | 37003                                                           | Alexander   | 37057       | Davidson  | 37113 | Macon      | 37175 | Transylvania | 51089 | Henry         | 51640 | Galax City        |  |
|                                                        | 37005                                                           | Alleghany   | 37059       | Davie     | 37115 | Madison    | 37189 | Watauga      | 51121 | Montgomery    | 51690 | Martinsville City |  |
|                                                        | 37009                                                           | Ashe        | 37067       | Forsyth   | 37121 | Mitchell   | 37193 | Wilkes       | 51141 | Patrick       | 51750 | Radford City      |  |
|                                                        | 37011                                                           | Avery       | 37075       | Graham    | 37149 | Polk       | 37197 | Yadkin       | 51143 | Pittsylvania  | 54047 | McDowell          |  |
|                                                        | 37021                                                           | Buncombe    | 37081       | Guilford  | 37151 | Randolph   | 37199 | Yancey       | 51155 | Pulaski       | 54055 | Mercer            |  |
|                                                        | 37023                                                           | Burke       | 37087       | Haywood   | 37157 | Rockingham | 51021 | Bland        | 51167 | Russell       | 54063 | Monroe            |  |
|                                                        | 37027                                                           | Caldwell    | 37089       | Henderson | 37159 | Rowan      | 51027 | Buchanan     | 51173 | Smyth         | 54109 | Wyoming           |  |
|                                                        | 37035                                                           | Catawba     | 37097       | Iredell   | 37161 | Rutherford | 51035 | Carroll      | 51185 | Tazewell      |       |                   |  |
|                                                        | 37039                                                           | Cherokee    | 37099       | Jackson   | 37169 | Stokes     | 51063 | Floyd        | 51191 | Washington    |       |                   |  |
|                                                        | 37043                                                           | Clay        | 37109       | Lincoln   | 37171 | Surry      | 51071 | Giles        | 51197 | Wythe         |       |                   |  |
|                                                        | 37045                                                           | Cleveland   | 37111       | McDowell  | 37173 | Swain      | 51077 | Grayson      | 51590 | Danville City |       |                   |  |
|                                                        | <b>Winship Cancer Institute at Emory University</b>             | 13          | Georgia     |           |       |            |       |              |       |               |       |                   |  |
|                                                        | <b>Yale Cancer Center at Yale University School of Medicine</b> | 09          | Connecticut |           |       |            |       |              |       |               |       |                   |  |
